# Supplementary material for: Inter -and intraobserver variation of ultrasonographic cartilage thickness assessments in small and large joints in healthy children
Source: Springer Nature journal article supplement (doi:10.1186/1546-0096-7-12), 2009-06-04
Supplement: Additional file 1 [file 1546-0096-7-12-s1.pdf]

**Table 1 Interobserver variation of ultrasound cartilage thickness measurements in large and small joints in 74 healthy children**

|              | Systematic Variation <sup>1</sup><br>(between observer I and observer II) |          | Random Variation <sup>2</sup> |                                         | Total variation                |
|--------------|---------------------------------------------------------------------------|----------|-------------------------------|-----------------------------------------|--------------------------------|
|              | Mean difference <sup>3</sup> in mm                                        | <i>p</i> | SD* "within child"<br>in mm   | SD <sup>o</sup> "within joint"<br>in mm | SD (CV <sup>4</sup> )<br>in mm |
| <b>Knee</b>  | 0.26                                                                      | <.0001   | 0.21                          | 0.24                                    | 0.32 (9.5%)                    |
| <b>Ankle</b> | -0.14                                                                     | <.0001   | 0.07                          | 0.18                                    | 0.19 (19.9%)                   |
| <b>Wrist</b> | 0.08                                                                      | 0.172    | 0.24                          | 0.35                                    | 0.43 (26.9%)                   |
| <b>MCP</b>   | -0.11                                                                     | <.0001   | 0.06                          | 0.10                                    | 0.12 (11.9%)                   |
| <b>PIP</b>   | -0.09                                                                     | <.0001   | 0.08                          | 0.10                                    | 0.13 (18.2%)                   |

<sup>1</sup>Systematic variation = whether one observer has a tendency to measure thicker or thinner cartilage thickness) <sup>2</sup>Random variation (e.g. biological variation within children) <sup>3</sup>Difference between cartilage thickness measurement observer I and observer II in mm. \*SD=Standard deviation within child, refers to the variation in SD in mm between the right and left extremity <sup>o</sup>SD=Standard deviation within joint, refers to the SD in mm between observers within the same side extremity <sup>4</sup>Coefficient of variation is calculated from the relative differences of measurements (CV=SD/mean x 100)
