# Supplementary material for: Inter -and intraobserver variation of ultrasonographic cartilage thickness assessments in small and large joints in healthy children
Source: Springer Nature journal article supplement (doi:10.1186/1546-0096-7-12), 2009-06-04
Supplement: Additional file 3 [file 1546-0096-7-12-s3.pdf]

**Table 3. Intraobserver variation (observer II) in US measurements of articular cartilage thickness in 17 healthy children**

**Observer II**

|              | Systematic Variation <sup>1</sup><br>(Day I and Day II) |          | Random Variation <sup>2</sup>          |                                                    | Total variation                |
|--------------|---------------------------------------------------------|----------|----------------------------------------|----------------------------------------------------|--------------------------------|
|              | Mean difference <sup>3</sup> in mm                      | <i>p</i> | SD* <sup>“within child”</sup><br>in mm | SD <sup>°</sup> <sup>“within joint”</sup><br>in mm | SD (CV <sup>4</sup> )<br>in mm |
| <b>Knee</b>  | -0.21                                                   | 0.053    | 0.23                                   | 0.24                                               | 0.34 (9.3%)                    |
| <b>Ankle</b> | -0.04                                                   | 0.555    | 0.00                                   | 0.24                                               | 0.24 (20.9%)                   |
| <b>Wrist</b> | -0.03                                                   | 0.751    | 0.21                                   | 0.29                                               | 0.36 (25.6%)                   |
| <b>MCP</b>   | 0.09                                                    | 0.057    | 0.08                                   | 0.13                                               | 0.15 (11.9%)                   |
| <b>PIP</b>   | 0.05                                                    | 0.297    | 0.09                                   | 0.13                                               | 0.16 (19.6%)                   |

1: Two weeks between the first a second measurement of cartilage thickness. <sup>2</sup>Random variation (e.g. biological variation within children) <sup>3</sup>Difference between cartilage thickness measurement day I and day II in mm. \*SD=Standard deviation within child, refers to the variation in SD in mm between the right and left extremity <sup>°</sup>SD=Standard deviation within joint, refers to the SD in mm between observers within the same side extremity <sup>4</sup> Coefficient of variation is calculated from the relative differences of measurements (CV=SD/mean x 100)
